# Supplementary material
Source: MDPI journal article supplement (https://www.mdpi.com/2073-4441/12/5/1460)
Supplement: s1 [file s1]

# Quantification and Characterization of Antimicrobial Resistance in Greywater Discharged to the Environment

Seema Porob <sup>1</sup>, Hillary A. Craddock <sup>2</sup>, Yair Motro <sup>2</sup>, Orly Sagi <sup>3</sup>, Michael Gdalevich <sup>4</sup>, Zubaida Ezery <sup>5</sup>, Nadav Davidovitch <sup>5</sup>, Zeev Ronen <sup>1</sup> and Jacob Moran-Gilad <sup>2,3,\*</sup>

**Table S1.** Details of greywater (GW) sources sampled from different Bedouin Villages.

| Village       | House ID | Source of greywater (GW) |
|---------------|----------|--------------------------|
| Al-Fura       | A        | Mixed GW                 |
|               | B        | Kitchen                  |
|               | C        | Kitchen                  |
|               | D        | Kitchen                  |
|               | E        | Kitchen                  |
| Qasr al-Sir   | A        | Kitchen                  |
|               | B        | Shower                   |
|               | C        | Kitchen                  |
|               | D        | Kitchen                  |
| Tel Arad      | A        | Laundry                  |
|               | B        | Mixed GW                 |
|               | C        | Kitchen                  |
| Um Batin      | A        | Mixed GW                 |
|               | B        | Kitchen                  |
|               | C        | Kitchen                  |
|               | D        | Kitchen                  |
| Wadi al-Na'am | A        | Kitchen                  |
|               | B        | Kitchen                  |
|               | C        | Kitchen                  |
|               | D        | Kitchen                  |

**Table S2.** Details of primers and annealing temperature used in real time PCR assay.

| Primers                | Sequence               | Gene                | Amplicon size | Annealing (°C) | Reference |
|------------------------|------------------------|---------------------|---------------|----------------|-----------|
| <i>bla</i> CTX-M-32 -F | CGTCACGCTGTTGTTAGGAA   | <i>bla</i> CTX-M-32 | 156 bp        | 63             | [45]      |
| <i>bla</i> CTX-M-32 -R | CGCTCATCAGCACGATAAAG   |                     |               |                |           |
| <i>qbla</i> TEM -F     | TTCCTGTTTTTGCTCACCCAG  | <i>bla</i> TEM      | 112 bp        | 60             | [46]      |
| <i>qbla</i> TEM -R     | CTCAAGGATCTTACCGCTGTTG |                     |               |                |           |
| <i>sul</i> 1-F         | CGCACCGGAAACATCGCTGCAC | <i>sul</i> 1        | 162 bp        | 65             | [47]      |
| <i>sul</i> 1-R         | TGAAGTTCCGCCGCAAGGCTCG |                     |               |                |           |
| <i>Int</i> 11C5-F      | GATCGGTCTGAATGCGTGT    | <i>int</i> 11       | 196 bp        | 60             | [48]      |
| <i>Int</i> 11C1-R      | GCCTTGATGTTACCCGAGAG   |                     |               |                |           |
| <i>qnr</i> S-F         | GACGTGCTAACTTGCGTG     | <i>qnr</i> S        | 118 bp        | 62             | [49]      |
| <i>qnr</i> S-R         | TGGCATTGTTGGAAACTT     |                     |               |                |           |
| 341F                   | GCCTACGGGAGGCAGCAG     | 16S rRNA            | 177 bp        | 55             | [50]      |
| 518R                   | ATTACCGCGGCTGCTGG      |                     |               |                |           |

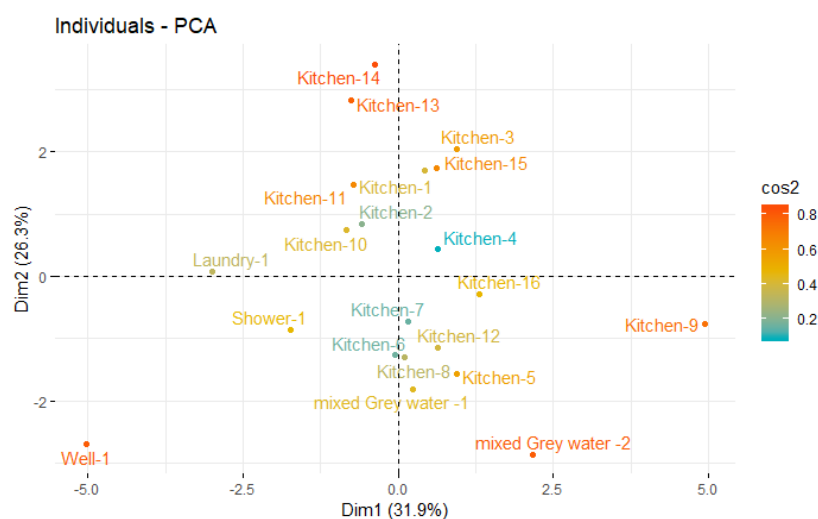

(A)

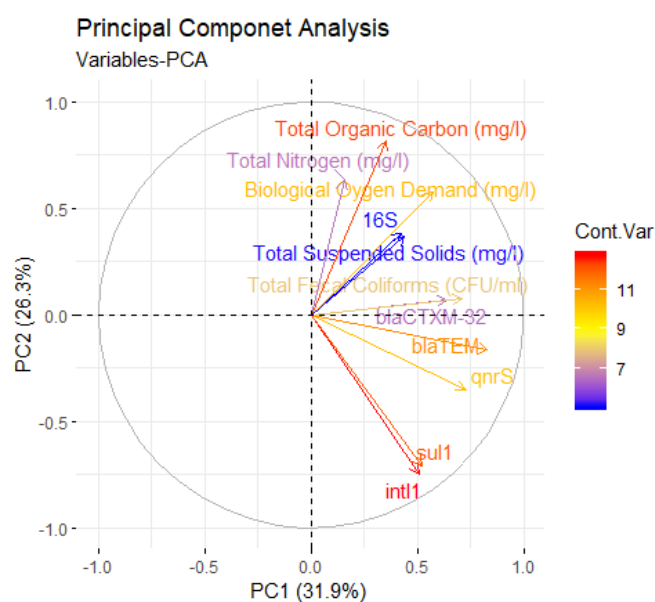

(B)

**Figure S1.** Principal component analysis of various physiochemical parameters and relative abundance of antimicrobial resistance genes analyzed in untreated GW samples. **(A)** Individuals PCA – each individual biological replicate represented as a colored label corresponding to the type of water sample. Values indicated on the axis of map correspond to the percentage of total variance explained by each axis (PC1 and PC2 respectively). **(B)** Variables PCA – showing contribution of individual variables to the total variance.

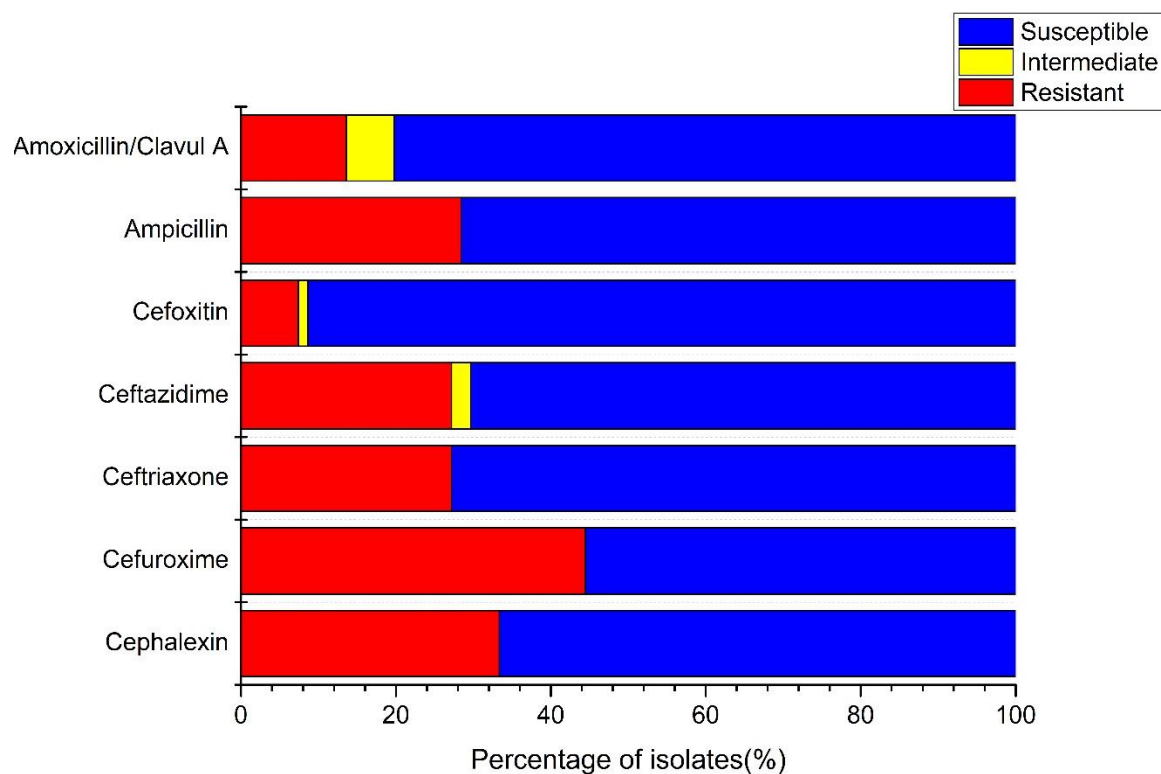

**Figure S2.** Percentage of resistance patterns of isolates obtained from GW of Bedouin villages against  $\beta$ -lactam antimicrobials. Data shows percentage susceptible, intermediate and resistance to  $\beta$ -lactam antimicrobials among 81 potential ESBL isolates.
